# Supplementary material
Source: PubMed Central journal article supplement (PMC524772)
Supplement: mbc_E04-06-0536_1.pdf [file mbc_E04-06-0536_1.pdf]

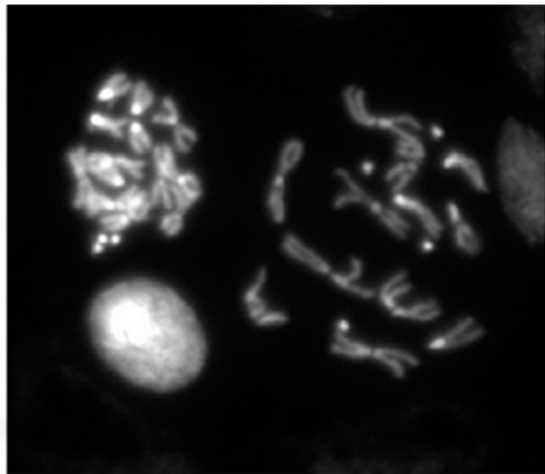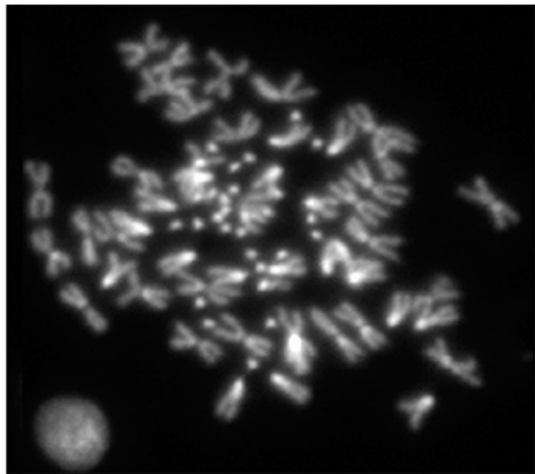

**A**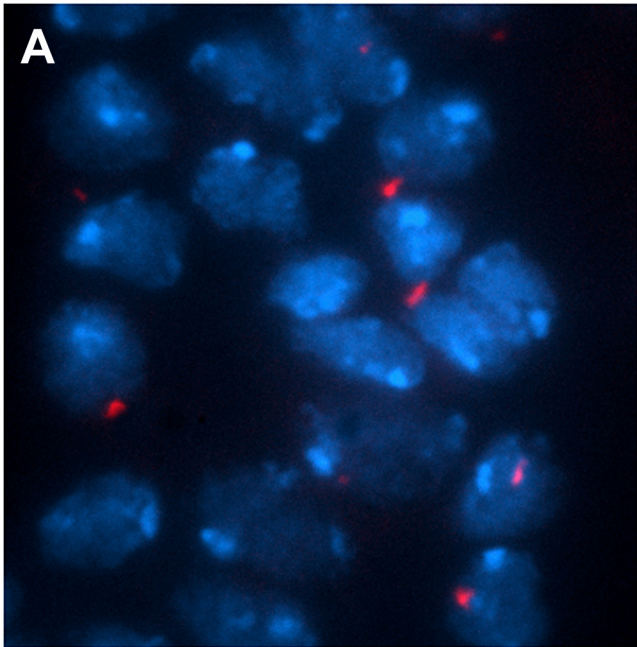**B**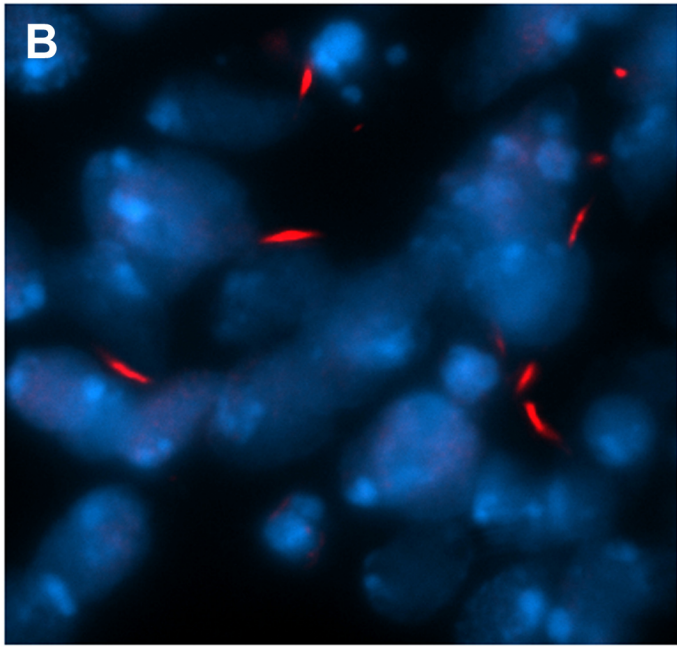

## **Figure legends for supplemental material**

**Figure 1.** Examples of polyploid DAPI-stained metaphases observed in *dck* mutant brains.

**Figure 2.** Examples of Feo-positive intercellular bridges observed in wild type (A) and *dck* mutant brains (B). Brain preparations were stained for Feo (red) and DNA (blue).
